# Supplementary material for: Comparison of energy and nutrient intake, dietary diversity score and physical development of William children with healthy children
Source: Research Square preprint supplement (doi:10.21203/rs.3.rs-6323899/v1), 2025-05-14
Supplement: Supplementary file 1 [file 41fe4b4aff6167fc2c0c1361.docx]

**Instructions for Completing the 24-Hour Dietary Record Questionnaire**

1. Recording Period: Please record your dietary intake for three non-consecutive days, including two weekdays and one rest day, totaling three records.

2. Time Frame: The recording time range is from 6:00 AM to 6:00 AM the next day. For each food intake, please note the duration, such as 12:00-12:30.

3. Food Types: All foods consumed during the day, including staple foods, snacks, water, beverages, etc., such as rice, chicken legs, biscuits, water, and others, should be listed in the table.

4. Food Quantity: It is recommended to use a kitchen scale for measurement or refer to the following standards:

(1) One egg: 50 grams

(2) A straight-sided bowl (diameter 11cm, height 5.3cm): approximately 150-200 grams of cooked rice per bowl.

(3) Lean meat the size of a palm: 50 grams

(4) One packet of side dish noodles: 20-30 grams

(5) One scoop of infant rice cereal: 5 grams

Please select the corresponding option based on the actual intake volume. If the food container or intake amount is not within the specified range, you may take photos to record your dietary intake. Take pictures of the food before and after consumption for documentation.

**24-Hour Dietary Record**

Example:

| Eating Time (Start - End) | Food Type | Food Composition | Food Portion | | |
| --- | --- | --- | --- | --- | --- |
| Quantity | Unit | weight（g） |
| 8:30-9:00 | Wonton | Flour、 Lean pork | 5 | Individual | 20 |
| 10:00-10:15 | Pure milk | Milk | 1 | Cup | 200 |
| 11:30-12:00 | Noodles | Noodles | 1/2 | Bowl | 35 |
|  | Egg | Egg | 1 | Piece | 50 |
|  | Tomato | Tomato | 1/2 | Piece | 75 |
|  | Beef | Lean beef |  |  | 20 |
| 16:00-16:10 | Snacks | Potato chips | 5 | Slice | 10 |
| 16:10-16:30 | Snacks | Biscuits | 1 | Slice | 5 |
| 16:30-16:50 | Fruits | Apple | 1/2 | Piece | 100 |
| 17:30-17:55 | Rice | Rice | 1/3 | Bowl | 60 |
|  | Winter melon | Winter melon | 1/4 | Bowl | 55 |
|  | Pork ribs | Pork ribs | 2 | Block | 30 |
|  | Shrimp | Prawns | 5 | Individual | 30 |
| 20:00-20:10 | Pure milk | Milk | 1 | Cup | 200 |

**24-Hour Dietary Record**

Date of Completion:

| Eating Time (Start - End) | Food Type | Food Composition | Food Portion | | |
| --- | --- | --- | --- | --- | --- |
| Quantity | Unit | weight（g） |
|  |  |  |  |  |  |
|  |  |  |  |  |  |
|  |  |  |  |  |  |
|  |  |  |  |  |  |
|  |  |  |  |  |  |
|  |  |  |  |  |  |
|  |  |  |  |  |  |
|  |  |  |  |  |  |
|  |  |  |  |  |  |
|  |  |  |  |  |  |
|  |  |  |  |  |  |
|  |  |  |  |  |  |
|  |  |  |  |  |  |
|  |  |  |  |  |  |
|  |  |  |  |  |  |
|  |  |  |  |  |  |
|  |  |  |  |  |  |
|  |  |  |  |  |  |
|  |  |  |  |  |  |
|  |  |  |  |  |  |
|  |  |  |  |  |  |
|  |  |  |  |  |  |
|  |  |  |  |  |  |

**24-Hour Dietary Record**

Date of Completion:

| Eating Time (Start - End) | Food Type | Food Composition | Food Portion | | |
| --- | --- | --- | --- | --- | --- |
| Quantity | Unit | weight（g） |
|  |  |  |  |  |  |
|  |  |  |  |  |  |
|  |  |  |  |  |  |
|  |  |  |  |  |  |
|  |  |  |  |  |  |
|  |  |  |  |  |  |
|  |  |  |  |  |  |
|  |  |  |  |  |  |
|  |  |  |  |  |  |
|  |  |  |  |  |  |
|  |  |  |  |  |  |
|  |  |  |  |  |  |
|  |  |  |  |  |  |
|  |  |  |  |  |  |
|  |  |  |  |  |  |
|  |  |  |  |  |  |
|  |  |  |  |  |  |
|  |  |  |  |  |  |
|  |  |  |  |  |  |
|  |  |  |  |  |  |
|  |  |  |  |  |  |
|  |  |  |  |  |  |
|  |  |  |  |  |  |

**24-Hour Dietary Record**

Date of Completion:

| Eating Time (Start - End) | Food Type | Food Composition | Food Portion | | |
| --- | --- | --- | --- | --- | --- |
| Quantity | Unit | weight（g） |
|  |  |  |  |  |  |
|  |  |  |  |  |  |
|  |  |  |  |  |  |
|  |  |  |  |  |  |
|  |  |  |  |  |  |
|  |  |  |  |  |  |
|  |  |  |  |  |  |
|  |  |  |  |  |  |
|  |  |  |  |  |  |
|  |  |  |  |  |  |
|  |  |  |  |  |  |
|  |  |  |  |  |  |
|  |  |  |  |  |  |
|  |  |  |  |  |  |
|  |  |  |  |  |  |
|  |  |  |  |  |  |
|  |  |  |  |  |  |
|  |  |  |  |  |  |
|  |  |  |  |  |  |
|  |  |  |  |  |  |
|  |  |  |  |  |  |
|  |  |  |  |  |  |
|  |  |  |  |  |  |
