# Supplementary material for: Comparison of energy and nutrient intake, dietary diversity score and physical development of William children with healthy children
Source: Research Square preprint supplement (doi:10.21203/rs.3.rs-6323899/v1), 2025-05-14
Supplement: Supplementary file 2 [file b3a2963832f48e23b9eeacdd.docx]

**Basic Information of the Child**

Dear Parents：

Hello! To better understand your child's dietary habits, we kindly request you to fill out the following basic information about your child accurately.

**1. Basic Details of the Child**

Treatment date：

Date of Birth：

Gender:

Clinic Number:

Child's Name:

**2. Past Medical History (Please fill in under the guidance of a doctor)**

（1）Has the child been diagnosed with Williams syndrome by a doctor?

□ Yes

□ No

（2）Does the child have any serious physical illnesses, neurological disorders, or psychiatric conditions?

□ Yes

□ No

（3）Is there a history of long-term chronic illnesses?

□ Yes

□ No

（4）Does the child have any food allergies?

□ Yes

□ No

（5）Is there a history of major surgical procedures?

□ Yes

□ No

We appreciate your cooperation in providing accurate and complete information, which will assist us in better understanding and caring for your child's health
